# Supplementary material for: Variability of transposable elements in six genetic isolates from North-Eastern Italy and their relationship with alcohol consumption, tobacco use and BMI
Source: Springer Nature journal article supplement (doi:10.1186/s12864-025-12225-1), 2025-11-11
Supplement: MOESM1 [file 12864_2025_12225_MOESM1_ESM.pdf]

**Variability of Transposable Elements in six genetic isolates from North-Eastern Italy and their relationship with alcohol consumption, tobacco use and BMI**

**Supplementary Materials**

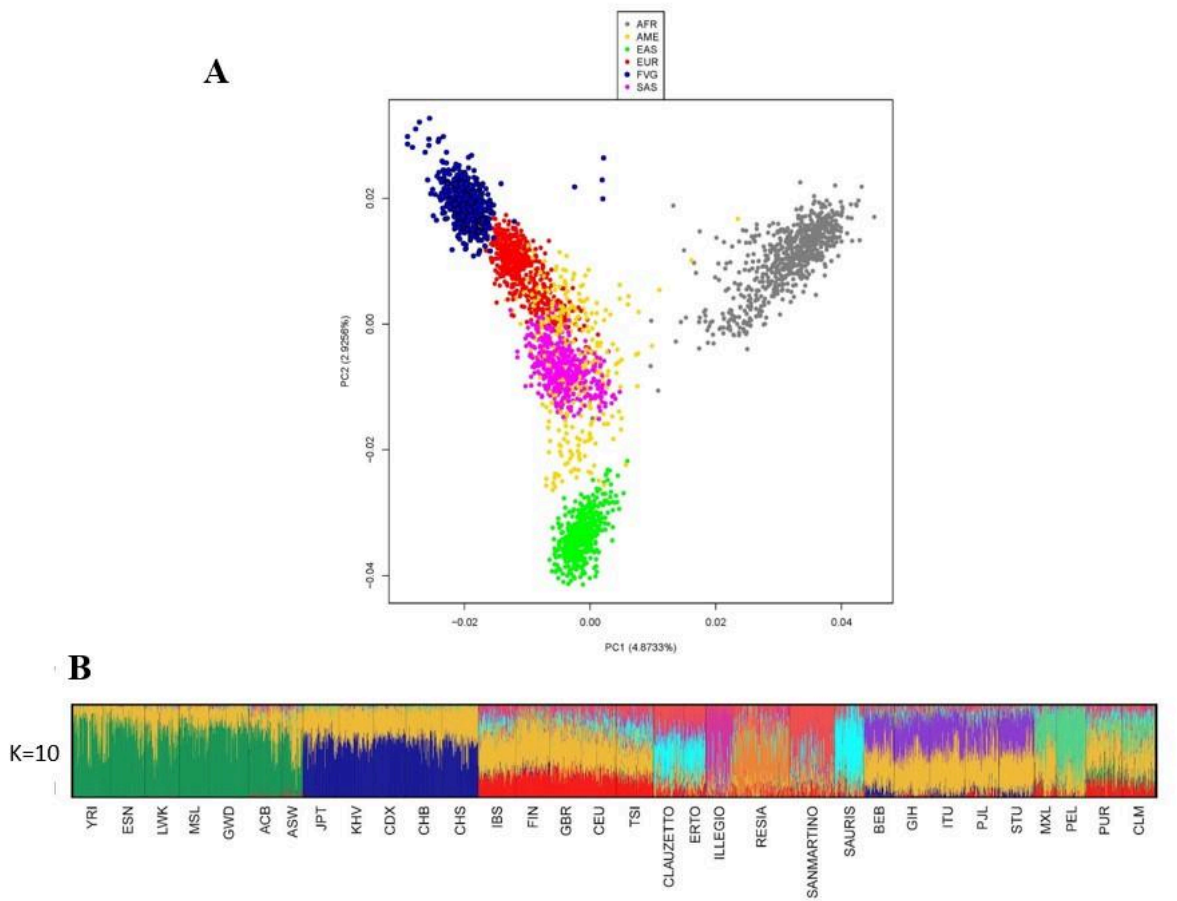

Supplementary Figure S1. A) Worldwide PCA plot including FVG isolates and all the 26 populations of the 1000 Genomes Project, divided by macro-areas: AFR=Africa; AME=America; EAS=East Asia; FVG=Friuli Venezia-Giulia; SAS=South Asia. B) Admixture plot at best fitting K=10 with all the 26 populations of the 1000 Genomes Project, plus the six isolates of FVG. IDs of the 26 1KGP populations are the same used by the project.

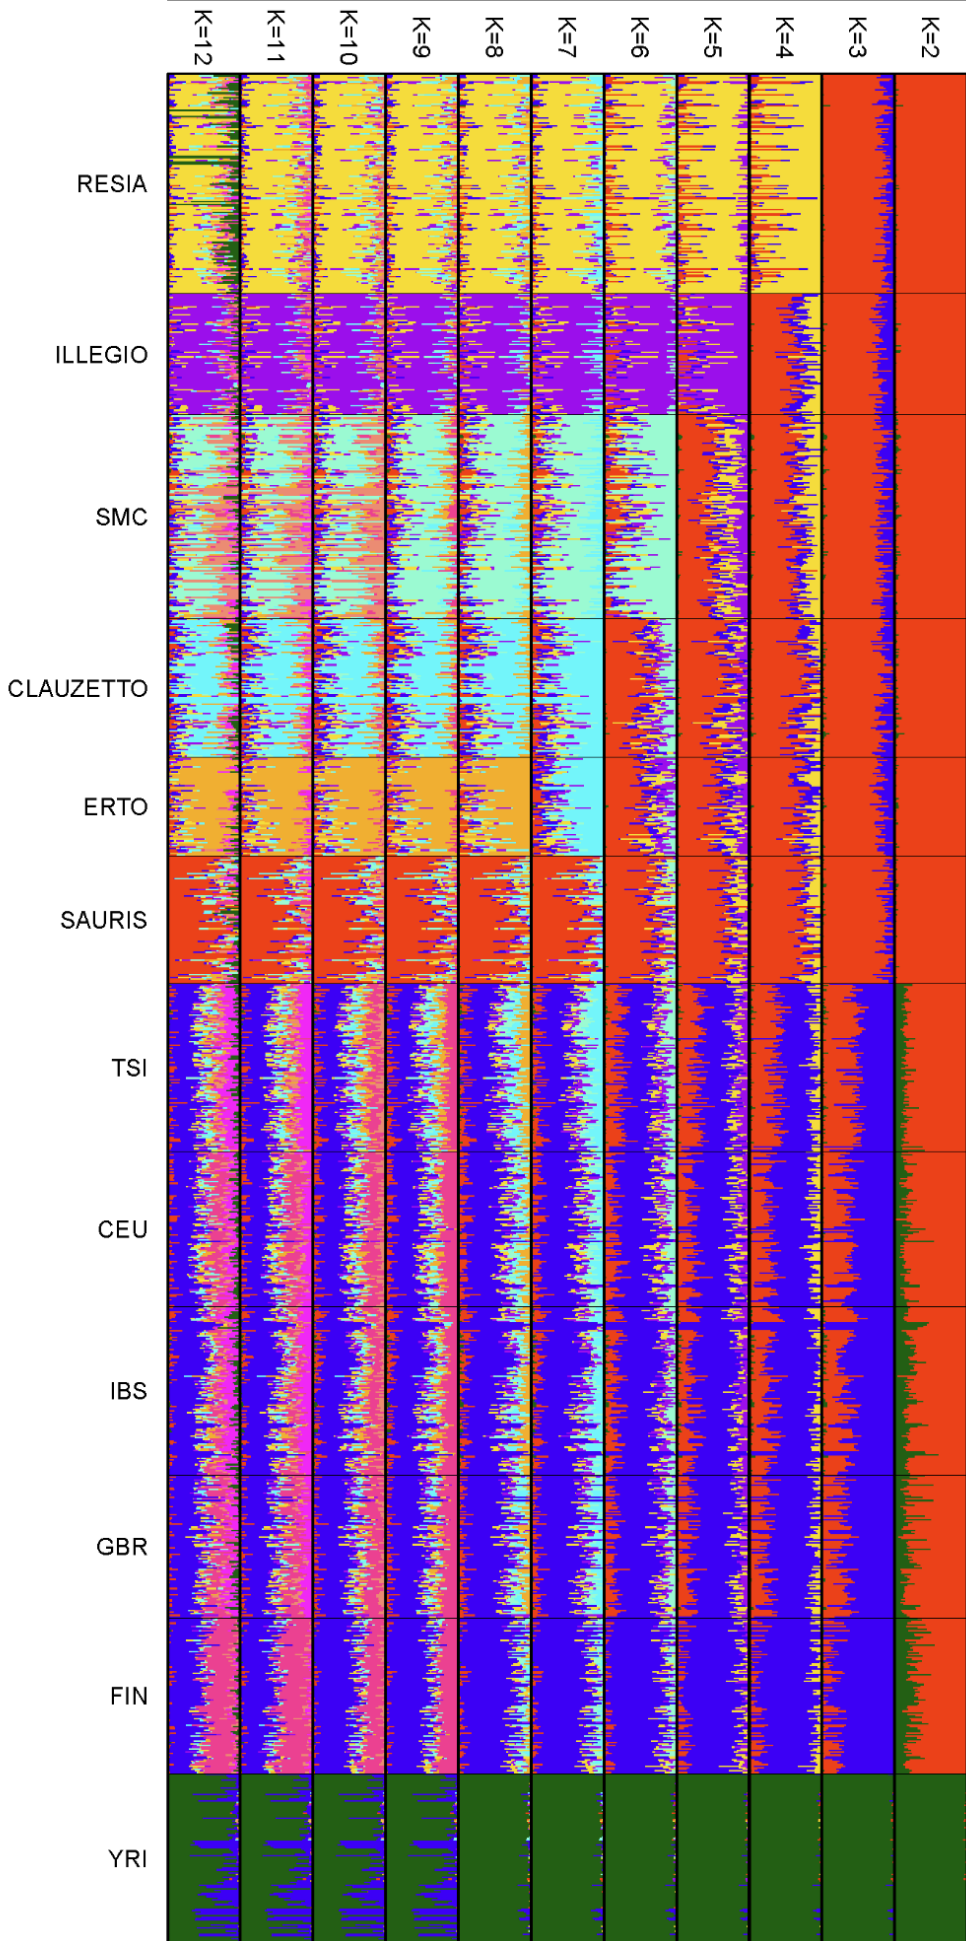

Supplementary Figure S2 (continues from the previous page). Admixture plots for all tested Ks (0-12) with the 7 isolated villages, European populations and YRI as an outgroup. IDs of the 1KGP populations are the same as the ones used in the project.

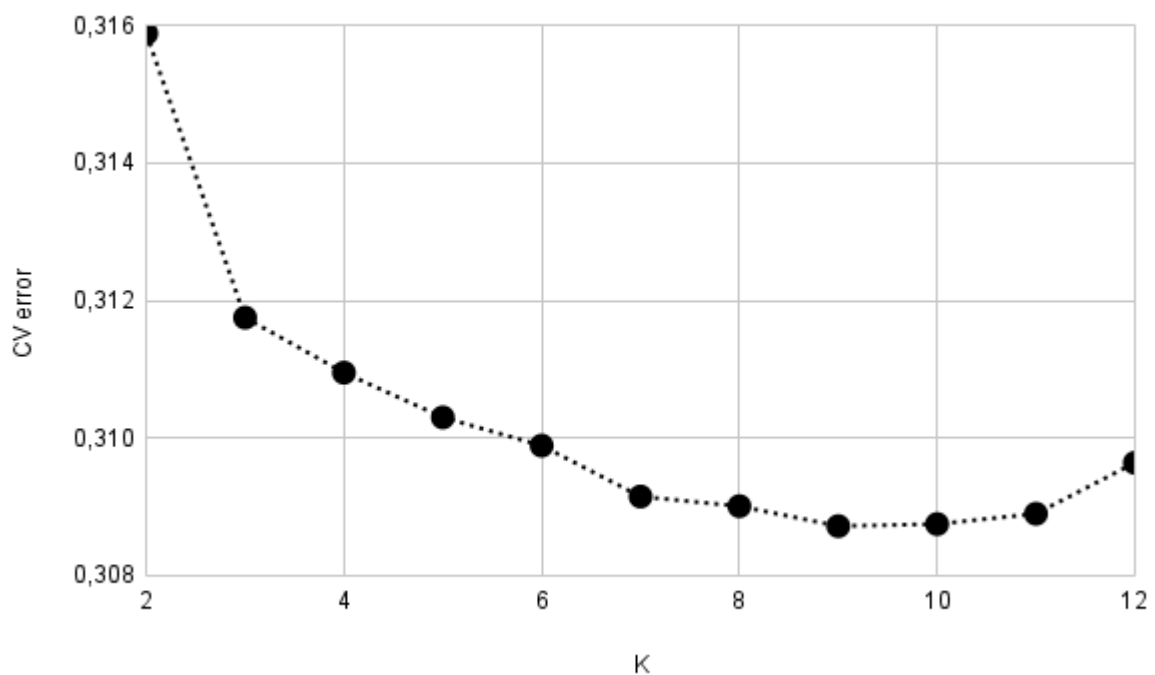

Supplementary Figure S3. Scatterplot graph highlighting cross-validation (CV) errors for each tested ancestry (K) for the 12 ADMIXTURE runs including the 7 villages, European populations and the African YRI as an outgroup.

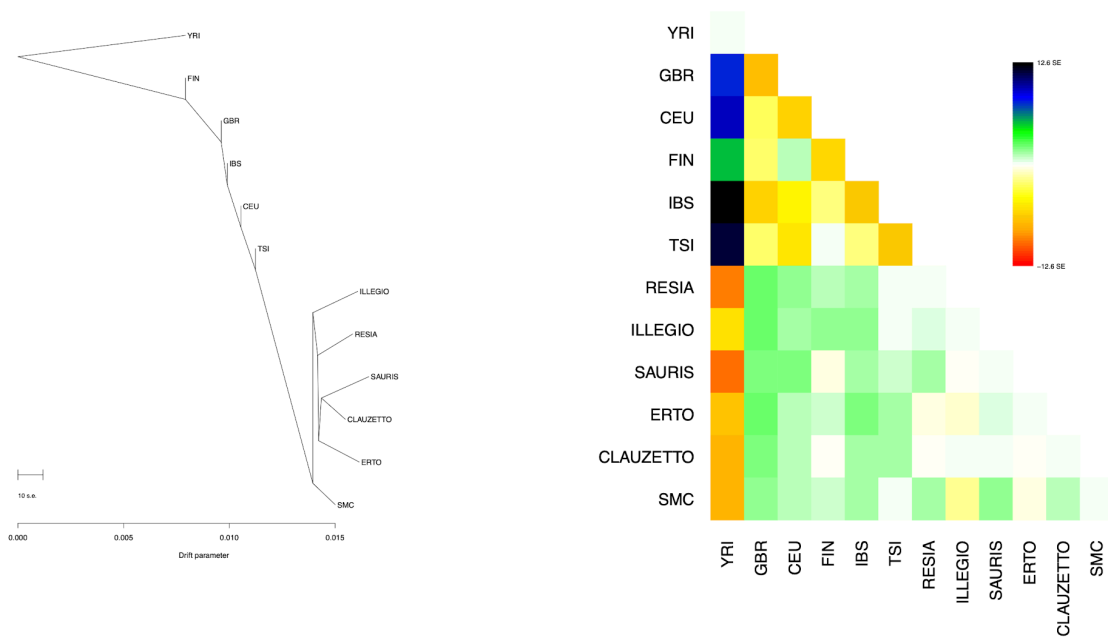

Supplementary Figure S4. TreeMix analyses. On the left the relationship graph is shown, which shows how the isolated populations cluster together after splitting from the TSI population. On the right, the residual variation of TreeMix analyses, a high positive value indicates possible evidence of additional gene flow between populations, and it shows how the isolated populations have no evidence of gene flow from the reference populations.

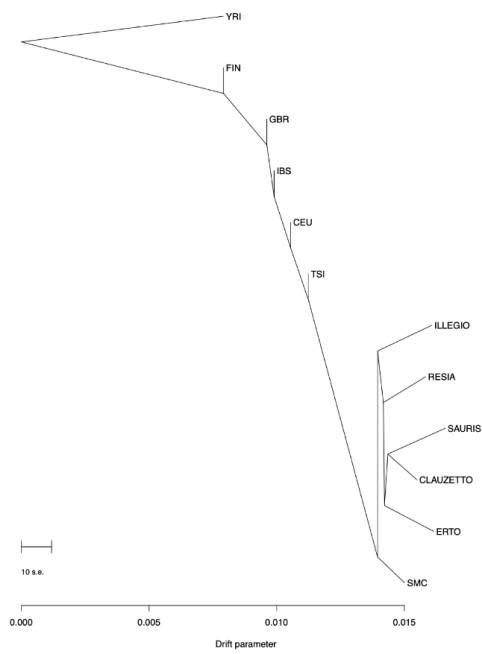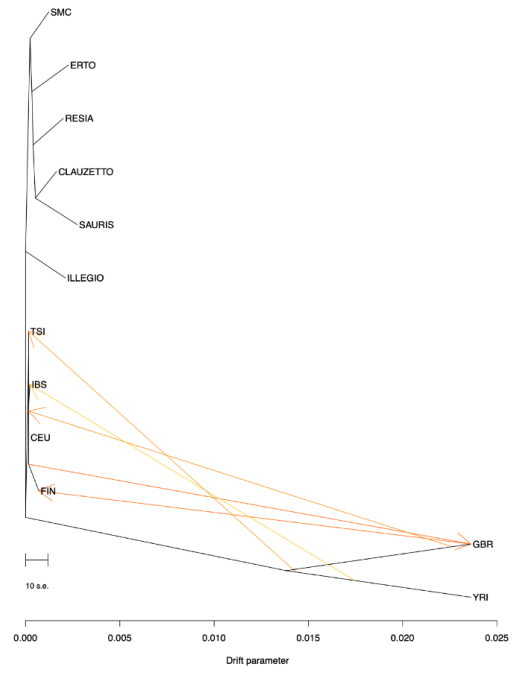

Supplementary Figure S5. TreeMix analyses with migration edges. On the left, tree with 0 migration edges. On the right, tree with 5 migration edges, explaining 99.9% of the variance.

| <b>Position/Hg38</b> | <b>TE Type</b> | <b>Gene ID</b> | <b>Insertion location</b> |
|----------------------|----------------|----------------|---------------------------|
| chr1:100366239       | Alu            | AGL            | EXON 24                   |
| chr1:109648713       | Alu            | CFAP276        | EXON 5                    |
| chr1:65272991        | Alu            | RAVER2         | EXON 9                    |
| chr2:170092544       | Alu            | LRP2           | EXON 29                   |
| chr2:202590094       | Alu            | ALS2           | EXON 20                   |
| chr2:220073207       | Alu            | ZFAND2B        | EXON 6                    |
| chr2:73496597        | Alu            | FBXO41         | EXON 1                    |
| chr2:84931310        | Alu            | DNAH6          | EXON 51                   |
| chr3:113015598       | Alu            | CFAP44         | EXON 33                   |
| chr4:128949763       | LINE1          | ABHD18         | EXON 10                   |
| chr4:30921811        | Alu            | PCDH7          | EXON 2                    |
| chr5:140215553       | Alu            | PCDHA7         | EXON 1                    |
| chr5:149677538       | Alu            | ARSI           | EXON 2                    |
| chr5:176306406       | SVA            | UNC5A          | EXON 12                   |
| chr6:101215134       | Alu            | ASCC3          | EXON 9                    |
| chr6:129786303       | LINE1          | LAMA2          | EXON 51                   |
| chr6:155116248       | Alu            | SCAF8          | EXON 6                    |
| chr6:32805660        | Alu            | TAP2           | EXON 2                    |
| chr6:4954206         | Alu            | CDYL           | EXON 7                    |
| chr7:107848084       | SVA            | NRCAM          | EXON 12                   |
| chr7:127230174       | Alu            | ARF5           | EXON 4                    |

| <b>Position/Hg38</b> | <b>TE Type</b> | <b>Gene ID</b> | <b>Insertion location</b> |
|----------------------|----------------|----------------|---------------------------|
| chr7:128852188       | Alu            | SMO            | EXON 12                   |
| chr7:140476723       | Alu            | BRAF           | EXON 13                   |
| chr8:10468773        | Alu            | RP1L1          | EXON 4                    |
| chr9:100616862       | LINE1          | FOXE1          | EXON 1                    |
| chr10:93242752       | Alu            | HECTD2         | EXON 8                    |
| chr12:121881827      | Alu            | KDM2B          | EXON 16                   |
| chr12:55714528       | Alu            | OR6C1          | EXON 1                    |
| chr13:35751205       | SVA            | NBEA           | EXON 12                   |
| chr14:24523719       | LINE1          | CARMIL3        | EXON 5                    |
| chr14:34269852       | Alu            | NPAS3          | EXON 12                   |
| chr15:23811635       | Alu            | MKRN3          | EXON 1                    |
| chr15:25924678       | Alu            | ATP10A         | EXON 21                   |
| chr15:50897115       | LINE1          | TRPM7          | EXON 21                   |
| chr16:2052233        | Alu            | ZNF598         | EXON 7                    |
| chr16:2374443        | SVA            | ABCA3          | EXON 12                   |
| chr16:85141466       | Alu            | CIBAR2         | EXON 4                    |
| chr17:16630902       | SVA            | CCDC144A       | EXON 12                   |
| chr17:56065448       | LINE1          | VEZF1          | EXON 1                    |
| chr17:71232302       | Alu            | C17orf80       | EXON 3                    |
| chr18:34647028       | Alu            | KIAA1328       | EXON 7                    |
| chr19:11727948       | Alu            | ZNF627         | EXON 4                    |
| chr19:32954844       | Alu            | DPY19L3        | EXON 14                   |

| <b>Position/Hg38</b> | <b>TE Type</b> | <b>Gene ID</b> | <b>Insertion location</b> |
|----------------------|----------------|----------------|---------------------------|
| chr19:36222848       | SVA            | KMT2B          | EXON 12                   |
| chr19:46443685       | Alu            | NOVA2          | EXON 4                    |
| chr19:57869033       | Alu            | ZNF304         | EXON 3                    |
| chr19:9721262        | Alu            | ZNF561         | EXON 6                    |
| chr20:30345355       | Alu            | TPX2           | EXON 3                    |
| chr20:3180667        | Alu            | DDRGK1         | EXON 4                    |
| chr20:35129001       | Alu            | DLGAP4         | EXON 4                    |

Supplementary Table S1 (continues from the previous pages). List of polymorphic TEs within exons. Positions (in human reference genome hg38), TE type and gene ID are shown.

| <b>K</b> | <b>CV Error</b> | <b>LogLikelihood</b> |
|----------|-----------------|----------------------|
| 2        | 0,31588         | -1122673,235654      |
| 3        | 0,31175         | -1111262,937266      |
| 4        | 0,31095         | -1105808,464568      |
| 5        | 0,31030         | -1101194,454838      |
| 6        | 0,30989         | -1096996,852554      |
| 7        | 0,30915         | -1092951,724377      |
| 8        | 0,30901         | -1089459,898436      |
| 9        | 0,30872         | -1086493,212541      |
| 10       | 0,30875         | -1083840,100963      |
| 11       | 0,30890         | -1081309,344333      |
| 12       | 0,30964         | -1078983,912422      |

Supplementary Table S2. List of cross validation (CV) errors and LogLikelihood values associated with each tested ancestry number (K) for the ADMIXTURE run including the 7 isolated villages, European populations, and African YRI as an outgroup.

|                         |                |                 |                 |                      |                      |
|-------------------------|----------------|-----------------|-----------------|----------------------|----------------------|
| <b>chr:position</b>     | chr17:49150166 | chr12:14020945  | chr12:129970510 | chr12:123580101      | chr18:29519986       |
| <b>TE type</b>          | SVA            | Alu             | Alu             | Alu                  | Alu                  |
| <b>Gene</b>             | <b>SPAG9</b>   | <b>GRIN2B</b>   | <b>TMEM132D</b> | <b>PITPNM2</b>       | <b>TRAPPC8</b>       |
| <b>Association test</b> | BMI_sex_age    | Alcohol_sex_age | Smoke_sex_age   | N_cigarettes_N_years | N_cigarettes_N_years |
| <b>beta_1</b>           | -0,0155        | 0,0652          | -0,106          | -2,06                | -3,4                 |
| <b>beta_2</b>           | -6,59          | -2,28           | 1,89            | 35,8                 | 43,4                 |
| <b>beta_3</b>           | 2,61           | 0,105           | 0,0602          |                      |                      |
| <b>Vbeta_1_1</b>        | 0,013          | 0,000974        | 0,00112         | 36,6                 | 36,4                 |
| <b>Vbeta_1_2</b>        | -0,0187        | -0,00113        | -0,000807       | 6,7                  | 7,51                 |
| <b>Vbeta_1_3</b>        | 0,0252         | 0,000202        | -0,0000102      |                      |                      |
| <b>Vbeta_2_2</b>        | 13,4           | 1,11            | 1,15            | 70,7                 | 64,4                 |
| <b>Vbeta_2_3</b>        | 1,47           | 0,00136         | -0,0022         |                      |                      |
| <b>Vbeta_3_3</b>        | 0,998          | 0,000918        | 0,000773        |                      |                      |
| <b>SE_beta1</b>         | 0,114017543    | 0,031208973     | 0,033466401     | 6,049793385          | 6,033241252          |
| <b>SE_beta2</b>         | 3,660601044    | 1,053565375     | 1,072380529     | 8,408329204          | 8,024961059          |
| <b>SE_beta3</b>         | 0,998999499    | 0,030298515     | 0,027802878     |                      |                      |
| <b>p score</b>          | 0,000442       | 0,000268        | 0,000456        | 0,000177             | 0,0000013            |

Supplementary Table S3. GEMMA output for constrained genes showing significant results.

For each significant insertion, effect sizes, associated standard error and p-values are reported.
